# Supplementary material for: Long noncoding intronic RNAs are differentially expressed in primary and metastatic pancreatic cancer
Source: Mol Cancer. 2011 Nov 13;10:141. doi: 10.1186/1476-4598-10-141 (PMC3225313; doi:10.1186/1476-4598-10-141)
Supplement: Additional File 2 — Table S1: List of transcripts differentially expressed in PDAC relative to chronic pancreatitis and non tumor tissue samples combined. [file 1476-4598-10-141-S2.XLS]

## Sheet: Plan1
Additional File 2, Table S1 - List of transcripts differentially expressed in PDAC relative to chronic pancreatitis and non tumor tissue samples combined
Probe ID	Gene Bank Acession	Probe Region	Gene Name	Gene ID	Gene Symbol	Ref Seq Gene	Chromossome	Log2 (Fold Change T/CP+NT)
3634	BF853527	Exonic	metallothionein 1H	4502	MT2A	NM_005953	chr16: 56642510 - 56643346	-1.2496
4380	BQ358748	Exonic	thioesterase superfamily member 5	284486	THEM5	NM_182578	chr1: 151823547 - 151826116	-1.22991
3964	AW748714	Exonic	zinc finger and SCAN domain containing 18	65982	ZSCAN18	NM_023926	chr19: 58599594 - 58600025	-1.14242
1414	BE170357	Exonic	cell cycle progression 1	9236	CCPG1	NM_020739	chr15: 55652546 - 55652915	-1.04759
4418	AW880616	Exonic	neuroligin 4, X-linked	57502	NLGN4X	NM_181332	chrX: 5808433 - 5808972	-1.01945
1442	BF890756	Exonic	cullin 4B	8450	CUL4B	NM_003588	chrX: 119677966 - 119681021	-0.964669
2945	BE813923	Exonic	AT rich interactive domain 4A (RBP1-like)	5926	ARID4A	NM_023001	chr14: 58838692 - 58839233	-0.936714
3163	BE080775	Exonic	similar to transducin-like enhancer of split 1 (E(sp1) homolog, Drosophila); transducin-like enhancer of split 1 (E(sp1) homolog, Drosophila)	7088	TLE1	NM_005077	chr9: 84248419 - 84248751	-0.911965
3994	BF928925	Exonic	leucine rich repeat containing 57	255252	LRRC57	NM_153260	chr15: 42836092 - 42839500	-0.908758
4116	BF956998	Exonic	Notch homolog 4 (Drosophila)	4855	NOTCH4	NM_004557	chr6: 32180251 - 32182014	-0.891679
1289	BF883365	Exonic	MYC induced nuclear antigen	84864	MINA	NM_153182	chr3: 97664008 - 97668764	-0.884507
2870	BF920836	Exonic	transcription factor binding to IGHM enhancer 3	7030	TFE3	NM_006521	chrX: 48886720 - 48887130	-0.868797
4109	AW902244	Exonic	CaM kinase-like vesicle-associated	79012	CAMKV	NM_024046	chr3: 49895715 - 49896156	-0.832211
2564	BG003639	Exonic	neural cell adhesion molecule 1	4684	NCAM1	NM_000615	chr11: 113076801 - 113078666	-0.829661
4157	BE161600	Exonic	ST3 beta-galactoside alpha-2,3-sialyltransferase 5	8869	ST3GAL5	NM_003896	chr2: 86073499 - 86075194	-0.804236
1377	BF907266	Exonic	THO complex 2	57187	THOC2	NM_001081550	chrX: 122737000 - 122737309	-0.743515
4002	BF816617	Exonic	retinoid X receptor, alpha	6256	RXRA	NM_002957	chr9: 137331492 - 137331855	-0.741797
3098	BF848512	Exonic	WAS/WASL interacting protein family, member 2	147179	WIPF2	NM_133264	chr17: 38438372 - 38438743	-0.737183
4045	AW383781	Exonic	tripartite motif-containing 26	7726	TRIM26	NM_003449	chr6: 30152380 - 30152901	-0.709991
3649	BF889142	Exonic	CREB binding protein	1387	CREBBP	NM_001079846	chr16: 3776899 - 3777317	-0.701129
2083	BE708499	Exonic	deleted in liver cancer 1	10395	DLC1	NM_182643	chr8: 12943203 - 12943976	-0.686336
3674	BE694434	Exonic	A kinase (PRKA) anchor protein 11	11215	AKAP11	NM_016248	chr13: 42877859 - 42891701	-0.670001
4354	BF997721	Exonic	tripartite motif-containing 25	7706	TRIM25	NM_005082	chr17: 54966236 - 54966713	-0.662932
1615	BE926631	Exonic	ankyrin repeat domain 40	91369	ANKRD40	NM_052855	chr17: 48772971 - 48773355	-0.653665
4237	BE089334	Exonic	eukaryotic translation initiation factor 4E binding protein 2	1979	EIF4EBP2	NM_004096	chr10: 72185273 - 72185618	-0.651843
4127	BE825688	Exonic	forkhead box N2	3344	FOXN2	NM_002158	chr2: 48573374 - 48573739	-0.646286
3719	BQ318852	Exonic	eukaryotic translation initiation factor 1A, X-linked	9086	EIF1AY	NM_004681	chrY: 22744500 - 22754371	-0.620555
993	AW748486	Exonic	StAR-related lipid transfer (START) domain containing 3	10948	STARD3	NM_001165937	chr17: 37819074 - 37819526	-0.605898
4079	BF083029	Exonic	nuclear mitotic apparatus protein 1	4926	NUMA1	NM_006185	chr11: 71714302 - 71714553	-0.602573
3348	BF956997	Exonic	insulin receptor	3643	INSR	NM_001079817	chr19: 7115432 - 7116001	-0.590078
4479	BF851788	Exonic	metastasis associated 1	9112	MTA1	NM_004689	chr14: 105935806 - 105936531	-0.587692
4358	BE163446	Exonic	solute carrier family 25 (mitochondrial carrier; phosphate carrier), member 23	79085	SLC25A23	NM_024103	chr19: 6440350 - 6440918	-0.586337
3341	AW902178	Exonic	coronin, actin binding protein, 2B	10391	CORO2B	NM_001190456	chr15: 69019629 - 69019996	-0.578531
983	AW352153	Exonic	PRKC, apoptosis, WT1, regulator	5074	PAWR	NM_002583	chr12: 79986375 - 79990605	-0.571402
4016	BF156016	Exonic	formin binding protein 4	23360	FNBP4	NM_015308	chr11: 47738099 - 47738357	-0.563146
1049	BE168033	Exonic	nuclear factor of kappa light polypeptide gene enhancer in B-cells 1	4790	NFKB1	NM_001165412	chr4: 103500103 - 103514719	-0.547169
2160	BE832971	Exonic	phenylalanyl-tRNA synthetase, beta subunit	10056	FARSB	NM_005687	chr2: 223464681 - 223488446	-0.544217
3892	AW880836	Exonic	neuropilin 2	8828	NRP2	NM_003872	chr2: 206661782 - 206662220	-0.542563
3152	BF351473	Exonic	chromosome 1 open reading frame 115	79762	C1orf115	NM_024709	chr1: 220870418 - 220870743	-0.538458
2159	BG009760	Exonic	T-cell leukemia translocation altered gene	6988	TCTA	NM_022171	chr3: 49453065 - 49453401	-0.536143
2866	BF854041	Exonic	transforming, acidic coiled-coil containing protein 2	10579	TACC2	NM_006997	chr10: 124008155 - 124013595	-0.530196
784	BE828277	Exonic	THO complex 7 homolog (Drosophila)	80145	THOC7	NM_025075	chr3: 63819755 - 63822036	-0.517776
3334	BG005931	Exonic	breast cancer anti-estrogen resistance 3	8412	BCAR3	NM_003567	chr1: 94054875 - 94140324	-0.505567
3919	BF082553	Exonic	RWD domain containing 4A	201965	RWDD4	NM_152682	chr4: 184560966 - 184561269	-0.494098
4123	AW884452	Exonic	ribosomal protein L36a pseudogene 51; ribosomal protein L36a pseudogene 37; ribosomal protein L36a pseudogene 49; heterogeneous nuclear ribonucleoprotein H2 (H'); ribosomal protein L36a	6166	RPL36AL	NM_001001	chr14: 50085411 - 50085859	-0.478452
3908	BF996163	Exonic	major facilitator superfamily domain containing 2	84879	MFSD2A	NM_001136493	chr1: 40432298 - 40434034	-0.472157
3117	BE156258	Exonic	eukaryotic translation elongation factor 1 alpha-like 7; eukaryotic translation elongation factor 1 alpha-like 3; similar to eukaryotic translation elongation factor 1 alpha 1; eukaryotic translation elongation factor 1 alpha 1	645715	EEF1A1	NM_001402	chr6: 74225045 - 74225957	-0.46914
674	BF890754	Exonic	ubiquinol-cytochrome c reductase hinge protein-like; ubiquinol-cytochrome c reductase hinge protein	7388	UQCRH	NM_006004	chr1: 46775825 - 46782443	-0.446725
3720	AW889200	Exonic	similar to Down-regulated in metastasis protein (Key-1A6 protein) (Novel nucleolar protein 73) (NNP73); UTP20, small subunit (SSU) processome component, homolog (yeast)	27340	UTP20	NM_014503	chr12: 101779369 - 101779816	-0.445869
2580	BF956989	Exonic	A kinase (PRKA) anchor protein 2; paralemmin 2/ PALM2-AKAP2 readthrough transcript		AKAP2/ PALM2-AKAP2	NM_001004065, NM_001136562, NM_001198656/NM_007203, NM_147150	chr9: 112900635 - 112900980	-0.438357
3158	BG000783	Exonic	protease, serine, 12 (neurotrypsin, motopsin)	8492	PRSS12	NM_003619	chr4: 119201681 - 119202232	-0.435718
4121	BE168342	Exonic	deformed epidermal autoregulatory factor 1 (Drosophila)	10522	DEAF1	NM_021008	chr11: 679719 - 687941	-0.435418
1673	BF336884	Exonic	THO complex 3	84321	THOC3	NM_032361	chr5: 177309413 - 177310913	-0.42586
2935	BG000772	Exonic	CD14 molecule	929	CD14	NM_000591	chr5: 140011485 - 140011954	-0.413713
4507	BF756552	Exonic	axin 2	8313	AXIN2	NM_004655	chr17: 63525549 - 63525871	-0.39357
3479	BE061111	Exonic	TAF8 RNA polymerase II, TATA box binding protein (TBP)-associated factor, 43kDa	129685	TAF8	NM_138572	chr6: 42046925 - 42047215	-0.370675
1608	BG001145	Exonic	nucleoporin 85kDa	79902	NUP85	NM_024844	chr17: 73224852 - 73225287	-0.369938
873	CK327135	Exonic	synaptojanin 2 binding protein	55333	SYNJ2BP	NM_018373	chr14: 70837736 - 70838099	-0.318913
2597	BF372924	Exonic	centrosomal protein 70kDa	80321	CEP70	NM_024491	chr3: 138224250 - 138248240	-0.295793
1429	BF090391	Exonic	small proline-rich protein 1B	6699	SPRR1B	NM_003125	chr1: 153004798 - 153005343	-0.194578
609	CK327153	Exonic	actin, gamma 1	71	ACTG1	NM_001614	chr17: 79477178 - 79477612	0.383776
222	AW369265	Exonic	excision repair cross-complementing rodent repair deficiency, complementation group 5	2073	ERCC5	NM_000123	chr13: 103524547 - 103527941	0.451286
1693	AW605304	Exonic	coiled-coil domain containing 52	152185	SPICE1	NM_144718	chr3: 113165456 - 113172534	0.596681
2591	BE762975	Exonic	centrin, EF-hand protein, 2	1069	CETN2	NM_004344	chrX: 151996148 - 151997119	0.631079
3583	AW805129	Exonic	E74-like factor 3 (ets domain transcription factor, epithelial-specific )	1999	ELF3	NM_001114309	chr1: 201985924 - 201986245	0.640671
1408	BQ352893	Exonic	ATP synthase, H+ transporting, mitochondrial F1 complex, beta polypeptide	506	ATP5B	NM_001686	chr12: 57036569 - 57038715	0.663995
1404	BE709116	Exonic	cell division cycle 25 homolog B (S. pombe)	994	CDC25B	NM_021873	chr20: 3786443 - 3786685	0.680317
2518	BF988663	Exonic	syndecan 1	6382	SDC1	NM_002997	chr2: 20401873 - 20402387	0.710237
251	BE826656	Exonic	thyroid hormone receptor interactor 6	7205	TRIP6	NM_003302	chr7: 100468210 - 100470982	0.717396
928	BE841633	Exonic	membrane bound O-acyltransferase domain containing 2	129642	MBOAT2	NM_138799	chr2: 8998412 - 8998698	0.726925
1375	BE166709	Exonic	integrin, beta 5	3693	ITGB5	NM_002213	chr3: 124483236 - 124492611	0.738916
578	AW880912	Exonic	nischarin	11188	NISCH	NM_007184	chr3: 52526352 - 52526892	0.762805
617	BF735925	Exonic	OCIA domain containing 1	54940	OCIAD1	NM_001079839	chr4: 48859228 - 48863139	0.782383
601	BQ349514	Exonic	v-ral simian leukemia viral oncogene homolog A (ras related)	5898	RALA	NM_005402	chr7: 39726323 - 39736461	0.830491
2193	BE833209	Exonic	N-myc (and STAT) interactor	9111	NMI	NM_004688	chr2: 152127313 - 152132079	0.843342
1374	BE840232	Exonic	tumor suppressor candidate 3	7991	TUSC3	NM_006765	chr8: 15531254 - 15605963	0.914097
1849	CK326978	Exonic	diacylglycerol kinase, theta 110kDa	1609	DGKQ	NM_001347	chr4: 954420 - 955282	0.934482
3153	AW804421	Exonic	centromere protein T	80152	CENPT	NM_025082	chr16: 67863961 - 67864302	0.948362
2975	BF883034	Exonic	actin related protein 2/3 complex, subunit 1B, 41kDa; similar to Actin-related protein 2/3 complex subunit 1B (ARP2/3 complex 41 kDa subunit) (p41-ARC)	10095	ARPC1B	NM_005720	chr7: 98985809 - 98990358	0.955765
1600	AW393928	Exonic	transmembrane protein 87B	84910	TMEM87B	NM_032824	chr2: 112876058 - 112876711	0.959279
4404	BF989969	Exonic	pituitary tumor-transforming 1 interacting protein	754	PTTG1IP	NM_004339	chr21: 46269711 - 46270281	0.964488
287	BE833289	Exonic	vinculin	7414	VCL	NM_014000	chr10: 75879048 - 75879381	0.9681
1043	AW605349	Exonic	transforming growth factor, beta-induced, 68kDa	7045	TGFBI	NM_000358	chr5: 135394777 - 135399121	1.01132
642	BF883122	Exonic	CD63 molecule	967	CD63	NM_001040034	chr12: 56119916 - 56121037	1.03618
2348	BF375449	Exonic	trans-golgi network protein 2	10618	TGOLN2	NM_006464	chr2: 85545357 - 85545693	1.04796
3339	BQ310838	Exonic	heat shock protein 90kDa beta (Grp94), member 1	7184	HSP90B1	NM_003299	chr12: 104336329 - 104340474	1.04991
1367	AW391467	Exonic	interferon induced transmembrane protein 1 (9-27)	8519	IFITM3	NM_021034	chr11: 319884 - 320757	1.07626
1302	BE163603	Exonic	transmembrane protein 141	85014	TMEM141	NM_032928	chr9: 139686710 - 139687665	1.09453
4431	BE166669	Exonic	beta-2-microglobulin	567	B2M	NM_004048	chr15: 45003766 - 45010267	1.14821
2123	BQ349504	Exonic	lactate dehydrogenase A	3939	LDHA	NM_005566, NM_001135269, NM_001165414, NR_028500	chr11: 18427006 - 18429090	1.15307
2143	AW819761	Exonic	cadherin 1, type 1, E-cadherin (epithelial)	999	CDH1	NM_004360	chr16: 68868514 - 68869081	1.17007
229	AW939042	Exonic	S100 calcium binding protein A6	6277	S100A6	NM_014624	chr1: 153507124 - 153507833	1.20227
558	BF825996	Exonic	PERP, TP53 apoptosis effector	64065	PERP	NM_022121	chr6: 138412333 - 138412921	1.21342
1666	AW608129	Exonic	collagen triple helix repeat containing 1	115908	CTHRC1	NM_138455	chr8: 104388147 - 104394802	1.22951
613	BF951773	Exonic	RAN, member RAS oncogene family	5901	RAN	NM_006325	chr12: 131357147 - 131360274	1.23614
2157	BF880950	Exonic	hepsin	3249	HPN	NM_182983	chr19: 35556192 - 35557298	1.25357
3270	BF985067	Exonic	collagen, type I, alpha 1	1277	COL1A1	NM_000088	chr17: 48261490 - 48261694	1.34147
624	BE712464	Exonic	syntaxin 6	10228	STX6	NM_005819	chr1: 180959119 - 180974600	1.36866
2226	AW852323	Exonic	KDEL (Lys-Asp-Glu-Leu) endoplasmic reticulum protein retention receptor 2	11014	KDELR2	NM_006854	chr7: 6500778 - 6501263	1.43662
992	AW606067	Exonic	cyclin-dependent kinase 2 associated protein 1	8099	CDK2AP1	NM_004642	chr12: 123745864 - 123746351	1.47835
3249	BF820605	Exonic	actin related protein 2/3 complex, subunit 2, 34kDa	10109	ARPC2	NM_152862	chr2: 219093458 - 219110266	1.73988
2468	BF930663	Exonic	S100 calcium binding protein P	6286	S100P	NM_005980	chr4: 6698701 - 6699262	2.5698
1742	AW370679	Exonic	TIMP metallopeptidase inhibitor 1	7076	TIMP1	NM_003254	chrX: 47444333 - 47446082	2.61941
1670	AW902314	Exonic/ ncRNA	family with sequence similarity 36, member A/ non-protein coding RNA 201 (NCRNA00201)	116228/ 284702	FAM36A/ NCRNA00201	NM_198076/ NR_266778	chr1: 245007377 - 245007734	-0.691412
4283	AW901940	Intergenic	-	-	-	-	chr15: 93442037 - 93442479	-0.925984
3977	BF754591	Intergenic	-	-	-	-	chr1: 46653707 - 46654108	-0.910957
3897	BE155946	Intergenic	-	-	-	-	chr20: 1025153 - 1025834	-0.728378
3865	BE008094	Intergenic	-	-	-	-	chr2: 181710096 - 181710451	-0.676467
4262	BE702744	Intergenic	-	-	-	-	chr7: 127944519 - 127944846	-0.674166
1018	BF956245	Intergenic	-	-	-	-	chr7: 99345995 - 99346500	-0.59783
4268	BF918966	Intergenic	-	-	-	-	chr5: 92193518 - 92194056	-0.558392
2848	BF736784	Intergenic	-	-	-	-	chr1: 35644977 - 35645390	-0.550829
4280	BF944704	Intergenic	-	-	-	-	chr1: 11353583 - 11355287	-0.418097
4379	BF368581	Intronic	Sorbin and SH3 domain containing 1	10580	SORBS1	NM_015385	chr10: 97315461 - 97315809	-1.52563
4360	BE168353	Intronic	PAS domain containing serine/threonine kinase	23178	PASK	NM_015148	chr2: 242086059 - 242086526	-1.04791
4352	BE003587	Intronic	Protein phosphatase 4, regulatory subunit 1	9989	PPP4R1	NM_001042388	chr18: 9561281 - 9561760	-0.998703
1168	AW852151	Intronic	DIP2 disco-interacting protein 2 homolog B (Drosophila)	57609	DIP2B	NM_173602	chr12: 51007113 - 51007544	-0.965237
3842	BF334142	Intronic	Enolase superfamily member 1	55556	ENOSF1	NM_001126123	chr18: 709089 - 709430	-0.849006
914	BF893298	Intronic	Mitogen-activated protein kinase kinase 5	5607	MAP2K5	NM_002757	chr15: 67889806 - 67890177	-0.824874
4319	CK327106	Intronic	Tyrosine kinase, non-receptor, 2	10188	TNK2	NM_005781	chr3: 195591793 - 195592189	-0.80451
3912	BG004239	Intronic	neuroblastoma breakpoint family, member 10	100132406	NBPF10	NM_001039703	chr1: 145302128 - 145302563	-0.763682
3229	AW937483	Intronic	Activating signal cointegrator 1 complex subunit 3	10973	ASCC3	NM_006828	chr6: 101180631 - 101181205	-0.761309
4339	BF898694	Intronic	Megakaryoblastic leukemia (translocation) 1	57591	MKL1	NM_020831	chr22: 40849141 - 40849644	-0.699878
858	BG010309	Intronic	DAZ associated protein 1	26528	DAZAP1	NM_170711	chr19: 1419237 - 1419769	-0.69118
4258	BF364131	Intronic	Chromosome 16 open reading frame 46	123775	C16orf46	NM_152337	chr16: 81104689 - 81105025	-0.669909
3513	AW901803	Intronic	Gliomedin	342035	GLDN	NM_181789	chr15: 51642970 - 51643317	-0.658767
4064	BQ316935	Intronic	Phosphonoformate immuno-associated protein 5	10443	N4BP2L2	NM_033111	chr13: 33109399 - 33109744	-0.640838
76	BE160056	Intronic	Na+/K+ transporting ATPase interacting 2	154215	NKAIN2	NM_001040214	chr6: 124980949 - 124981492	-0.637796
3886	AW820168	Intronic	Syntaxin 12	23673	STX12	NM_177424	chr1: 28141725 - 28142251	-0.628345
2838	BE163917	Intronic	Guanine nucleotide binding protein (G protein), beta polypeptide 1	2782	GNB1	NM_002074	chr1: 1803765 - 1804063	-0.627562
3903	BE166370	Intronic	Nuclear receptor subfamily 2, group C, member 2	7182	NR2C2	NM_003298	chr3: 15084054 - 15084337	-0.621396
2435	AW846670	Intronic	Chromosome 11 open reading frame 49	79096	C11orf49	NM_001003676	chr11: 47169433 - 47169741	-0.606018
4253	BE089575	Intronic	Chromosome 20 open reading frame 7	79133	C20orf7	NM_001039375	chr20: 13789721 - 13790060	-0.582488
912	AW865910	Intronic	Nucleolar protein NOP5/NOP58	51602	NOP58	NM_015934	chr2: 203164022 - 203164376	-0.565735
3979	CK327186	Intronic	Leptin receptor	3953	LEPR	NM_002303	chr1: 66071979 - 66072278	-0.552585
790	AW860958	Intronic	Dystonin	667	DST	NM_015548	chr6: 56329341 - 56329893	-0.52793
3585	BF875569	Intronic	Activating transcription factor 3	467	ATF3	NM_001030287	chr1: 212785642 - 212786212	-0.502878
2384	BE168993	Intronic	Macrophage erythroblast attacher	10296	MAEA	NM_001017405	chr4: 1318234 - 1318651	-0.473573
846	BE160464	Intronic	Gephyrin	10243	GPHN	NM_001024218	chr14: 66990664 - 66991047	-0.453979
3849	BE007885	Intronic	Rho GTPase activating protein 12	94134	ARHGAP12	NM_018287	chr10: 32168422 - 32168792	-0.447775
2411	BF894929	Intronic	Ubiquitin specific peptidase 15	9958	USP15	NM_006313	chr12: 62725137 - 62725661	-0.411949
1194	BF944729	Intronic	Arrestin, beta 1	408	ARRB1	NM_020251	chr11: 75045505 - 75045972	-0.39158
2784	BF857841	Intronic	Inositol 1,4,5-triphosphate receptor, type 1	3708	ITPR1	NM_001099952	chr3: 4786881 - 4787338	-0.333775
4357	CK327190	Intronic	Zinc finger protein 644	84146	ZNF644	NM_016620	chr1: 91432941 - 91433257	-0.333763
446	BF919473	Intronic	Catenin (cadherin-associated protein), delta 1	1500	CTNND1	NM_001085458	chr11: 57541563 - 57541976	-0.26146
1695	AW937741	Intronic	SFRS protein kinase 1	6732	SRPK1	NM_003137	chr6: 35819568 - 35820194	0.997422
3483	BE062809	Intronic/ Intronic	TMEM189-UBE2V1 readthrough/ ubiquitin-conjugating enzyme E2 variant 1	387522/ 7335	TMEM189-UBE2V1/ UBE2V1	NM_199203/ NM_001032288, NM_021988, NM_022442, NM_199144	chr20: 48718697 - 48719099	-0.565849
