# Supplementary material for: Long noncoding intronic RNAs are differentially expressed in primary and metastatic pancreatic cancer
Source: Mol Cancer. 2011 Nov 13;10:141. doi: 10.1186/1476-4598-10-141 (PMC3225313; doi:10.1186/1476-4598-10-141)
Supplement: Additional File 3 — Table S2: Validation of protein-coding genes differentially expressed in PDAC by meta-analysis of published data. [file 1476-4598-10-141-S3.XLS]

## Sheet: Plan1
Additional file 3, Table S2 - Validation of protein-coding genes differentially expressed in PDAC by meta-analysis of published data
Gene Symbol	Entrez Gene ID	# Concordant studies/ # Overlaping studies	Log2 (Fold Change)
			This study	a	b	c	d	e		f	g	h			i	j	k	l
			PDAC/CP+NT	PDAC/N	PDAC/CP	PDAC/NP	PDAC/N	PDAC/CP	PDAC/NP	PDAC/N	PDAC/NP	CL/NP	PDAC/CP	PDAC/NP	PDAC/NP	PDAC/N	PDAC/NP	PDAC/NP
S100P	6286	11/11	2.57	3.8		3		2.86	3.43	1.64	3.13	4.09	4.09	4.46		>2.32	7.25
COL1A1	1277	4/4	1.34			2.32		0.16	2							>2.32
TGFBI	7045	2/3	1.01					-0.1	2.39						2.32
ARPC1B	10095	2/2	0.96					0.93	1.84
SDC1	6382	2/2	0.71					1.04	1.89
TCTA	6988	2/2	-0.54					-1.36	-2.18
S100A6	6277	2/2	1.2	1.42		2.81
CD14	929	1/2	-0.41					-0.14	2.65
COL1A1	1277	1/2	1.34					-0.56	1.98
DLC1	10395	1/1	-0.69													<-2.32
TLE1	7088	1/1	-0.91													<-2.32
ACTG1	71	1/1	0.38	1.07
AXIN2	8313	1/1	-0.39	-1.03
ITGB5	3693	1/1	0.74															2.14
MTA1	9112	1/1	-0.59													<-2.32
MOACT2	129642	1/1	0.73													>2.32
TIMP1	7076	1/1	2.62				UP
TMEM141	85014	1/1	1.09	1.28
TUSC3	7991	1/1	0.91	1.51
ZSCAN18	65982	1/1	-1.14													<-2.32
HPN	3249	0/2	1.25					-3.47	-4.32
STX6	10228	0/2	1.37		-9.35	-5.64
BCAR3	8412	0/1	-0.51	1.4
NOTCH4	4855	0/1	-0.89				UP
PDAC: Pancreatic Ductal Adenocarcinoma, NT: Non tumoral tissue adjacent to the tumor site, NP : Normal tissue (bulk tissue), N: Normal ductal cells (microdissected tissue), CP : Chronic Pancreatitis, CL : Cell Line intraepithelial neoplasias
aBuchholz M et al, 2005 [1]; bCrnogorac-Jurcevic T et al, 2005 [2]; cCrnogorac-Jurcevic T et al, 2003 [3]; dCrnogorac-Jurcevic T et al, 2002 [4]; eFriess H et al,2003 [5]; fGrutzmann R et al, 2004 [6]; gIacobuzio-Donahue CA et al, 2002 [7]; hLogsdon CD et al, 2003 [8], iLu et al, 2004 [9]; jNakamura T et al, 2004 [10]; kSegara D et al, 2005 [11] ; lTan ZJ et al,2003 [12]
[1]	Buchholz M, Braun M, Heidenblut A, Kestler HA, Kloppel G, Schmiegel W, Hahn SA, Luttges J, Gress TM: Transcriptome analysis of microdissected pancreatic intraepithelial neoplastic lesions. Oncogene 2005, 24:6626-6636.
[2]	Crnogorac-Jurcevic T, Gangeswaran R, Bhakta V, Capurso G, Lattimore S, Akada M, Sunamura M, Prime W, Campbell F, Brentnall TA, et al: Proteomic analysis of chronic pancreatitis and pancreatic adenocarcinoma. Gastroenterology 2005, 129:1454-1463.
[3]	Crnogorac-Jurcevic T, Missiaglia E, Blaveri E, Gangeswaran R, Jones M, Terris B, Costello E, Neoptolemos JP, Lemoine NR: Molecular alterations in pancreatic carcinoma: expression profiling shows that dysregulated expression of S100 genes is highly prevalent. J Pathol 2003, 201:63-74
[4]	Crnogorac-Jurcevic T, Efthimiou E, Nielsen T, Loader J, Terris B, Stamp G, Baron A, Scarpa A, Lemoine NR: Expression profiling of microdissected pancreatic adenocarcinomas. Oncogene 2002, 21:4587-4594.
[5]	Friess H, Ding J, Kleeff J, Fenkell L, Rosinski JA, Guweidhi A, Reidhaar-Olson JF, Korc M, Hammer J, Buchler MW: Microarray-based identification of differentially expressed growth- and metastasis-associated genes in pancreatic cancer. Cell Mol Life Sci 2003, 60:1180-1199.
[6]	Grutzmann R, Pilarsky C, Ammerpohl O, Luttges J, Bohme A, Sipos B, Foerder M, Alldinger I, Jahnke B, Schackert HK, et al: Gene expression profiling of microdissected pancreatic ductal carcinomas using high-density DNA microarrays. Neoplasia 2004, 6:611-622.
[7]	Iacobuzio-Donahue CA, Maitra A, Shen-Ong GL, van Heek T, Ashfaq R, Meyer R, Walter K, Berg K, Hollingsworth MA, Cameron JL, et al: Discovery of novel tumor markers of pancreatic cancer using global gene expression technology. Am J Pathol 2002, 160:1239-1249
[8]	Logsdon CD, Simeone DM, Binkley C, Arumugam T, Greenson JK, Giordano TJ, Misek DE, Kuick R, Hanash S: Molecular profiling of pancreatic adenocarcinoma and chronic pancreatitis identifies multiple genes differentially regulated in pancreatic cancer. Cancer Res 2003, 63:2649-2657
[9]	Lu Z, Hu L, Evers S, Chen J, Shen Y: Differential expression profiling of human pancreatic adenocarcinoma and healthy pancreatic tissue. Proteomics 2004, 4:3975-3988
[10]	Nakamura T, Furukawa Y, Nakagawa H, Tsunoda T, Ohigashi H, Murata K, Ishikawa O, Ohgaki K, Kashimura N, Miyamoto M, et al: Genome-wide cDNA microarray analysis of gene expression profiles in pancreatic cancers using populations of tumor cells and normal ductal epithelial cells selected for purity by laser microdissection. Oncogene 2004, 23:2385-2400
[11]	Segara D, Biankin AV, Kench JG, Langusch CC, Dawson AC, Skalicky DA, Gotley DC, Coleman MJ, Sutherland RL, Henshall SM: Expression of HOXB2, a retinoic acid signaling target in pancreatic cancer and pancreatic intraepithelial neoplasia. Clin Cancer Res 2005, 11:3587-3596
[12]	Tan ZJ, Hu XG, Cao GS, Tang Y: Analysis of gene expression profile of pancreatic carcinoma using cDNA microarray. World J Gastroenterol 2003, 9:818-823
