# Supplementary material for: Long noncoding intronic RNAs are differentially expressed in primary and metastatic pancreatic cancer
Source: Mol Cancer. 2011 Nov 13;10:141. doi: 10.1186/1476-4598-10-141 (PMC3225313; doi:10.1186/1476-4598-10-141)
Supplement: Additional File 7 — Table S4: Genes from the pancreatic cancer metastasis signature related to tumor aggressiveness in other cancer types. [file 1476-4598-10-141-S7.XLS]

## Sheet: Plan1
Additional File 7, Table S4 - genes from the pancreatic cancer metastasis signature related to tumor aggressiveness in other cancer types
Gene Symbol	Cancer type	Description	Reference
CYFIP1	colorectal cancer	lower overall survival rate in colorectal cancer	[1]
NOTCH4	salivary adenoid cystic carcinoma	expression was significantly higher in clinical samples in salivary adenoid cystic carcinoma with metastasis	[2]
LDHA	cervical carcinoma	down regulated in cervival carcinoma with lymphnode metastasis	[3]
SH3PXD2A	prostate cancer	up regulation of SH3PXD2A is promoted by Runx2 and is correlated with metastatic behaviour	[4]
TFPI	breast cancer	TFPI was detected in cancer cells localised in lymph node metastatic foci of breast cancer	[5]
CBFB	epithelial tumor cells	poor prognosis in epithelial tumor cells	[6]
WIPF1	Colorectal cancer, breast cancer and glioma	Low expression of WIPF1 co-expression gene module had prognosis	[7]
STARD3	breast cancer	elevated levels in patients with poor outcome	[8]
MARK2	cervical cancer	up regulation in cysplatin-resistant HeLa cells	[9]
CCAR1	colon cancer (cell lines)	depletion of CCAR1 suppress anchorage-independent growth	[10]
MHY11	Breast cancer	down-regulated in tumor and metastases	[11]
PAWR	Breast cancer	down-regulation of PAWR is associated with poor prognosis in breast cancer	[12]
DPYSL2	colorectal cancer	down-regulation of DPYSL2 is associated with metastatic colorectal cancer	[13]
[1]	Silva JM, Ezhkova E, Silva J, Heart S, Castillo M, Campos Y, Castro V, Bonilla F, Cordon-Cardo C, Muthuswamy SK, et al: Cyfip1 is a putative invasion suppressor in epithelial cancers. Cell 2009, 137:1047-1061
[2]	Ding LC, She L, Zheng DL, Huang QL, Wang JF, Zheng FF, Lu YG: Notch-4 contributes to the metastasis of salivary adenoid cystic carcinoma. Oncol Rep, 24:363-368
[3]	Huang L, Zheng M, Zhou QM, Zhang MY, Jia WH, Yun JP, Wang HY: Identification of a gene-expression signature for predicting lymph node metastasis in patients with early stage cervical carcinoma. Cancer
[4]	Baniwal SK, Khalid O, Gabet Y, Shah RR, Purcell DJ, Mav D, Kohn-Gabet AE, Shi Y, Coetzee GA, Frenkel B: Runx2 transcriptome of prostate cancer cells: insights into invasiveness and bone metastasis. Mol Cancer, 9:258
[5]	Sierko E, Wojtukiewicz MZ, Zimnoch L, Kisiel W: Expression of tissue factor pathway inhibitor (TFPI) in human breast and colon cancer tissue. Thromb Haemost, 103:198-204
[6]	Mendoza-Villanueva D, Deng W, Lopez-Camacho C, Shore P: The Runx transcriptional co-activator, CBFbeta, is essential for invasion of breast cancer cells. Mol Cancer, 9:171
[7]	Staub E, Groene J, Heinze M, Mennerich D, Roepcke S, Klaman I, Hinzmann B, Castanos-Velez E, Pilarsky C, Mann B, et al: An expression module of WIPF1-coexpressed genes identifies patients with favorable prognosis in three tumor types. J Mol Med 2009, 87:633-644
[8]	Cai W, Ye L, Sun J, Mansel RE, Jiang WG: Expression of MLN64 influences cellular matrix adhesion of breast cancer cells, the role for focal adhesion kinase. Int J Mol Med, 25:573-580
[9]	Wu ZZ, Lu HP, Chao CC: Identification and functional analysis of genes which confer resistance to cisplatin in tumor cells. Biochem Pharmacol, 80:262-276
[10]	Ou CY, Kim JH, Yang CK, Stallcup MR: Requirement of cell cycle and apoptosis regulator 1 for target gene activation by Wnt and beta-catenin and for anchorage-independent growth of human colon carcinoma cells. J Biol Chem 2009, 284:20629-20637
[11]	Seitz S, Korsching E, Weimer J, Jacobsen A, Arnold N, Meindl A, Arnold W, Gustavus D, Klebig C, Petersen I, Scherneck S: Genetic background of different cancer cell lines influences the gene set involved in chromosome 8 mediated breast tumor suppression. Genes Chromosomes Cancer 2006, 45:612-627
[12]	Nagai MA, Gerhard R, Salaorni S, Fregnani JH, Nonogaki S, Netto MM, Soares FA: Down-regulation of the candidate tumor suppressor gene PAR-4 is associated with poor prognosis in breast cancer. Int J Oncol, 37:41-49
[13]	Nakagawa H, Liyanarachchi S, Davuluri RV, Auer H, Martin EW, Jr., de la Chapelle A, Frankel WL: Role of cancer-associated stromal fibroblasts in metastatic colon cancer to the liver and their expression profiles. Oncogene 2004, 23:7366-7377
